# Supplementary material for: Mulberry Leaf Compounds and Gut Microbiota in Alzheimer’s Disease and Diabetes: A Study Using Network Pharmacology, Molecular Dynamics Simulation, and Cellular Assays
Source: MDPI journal article supplement (doi:10.3390/ijms25074062), 2024-04-05
Supplement: s1 [file s1]

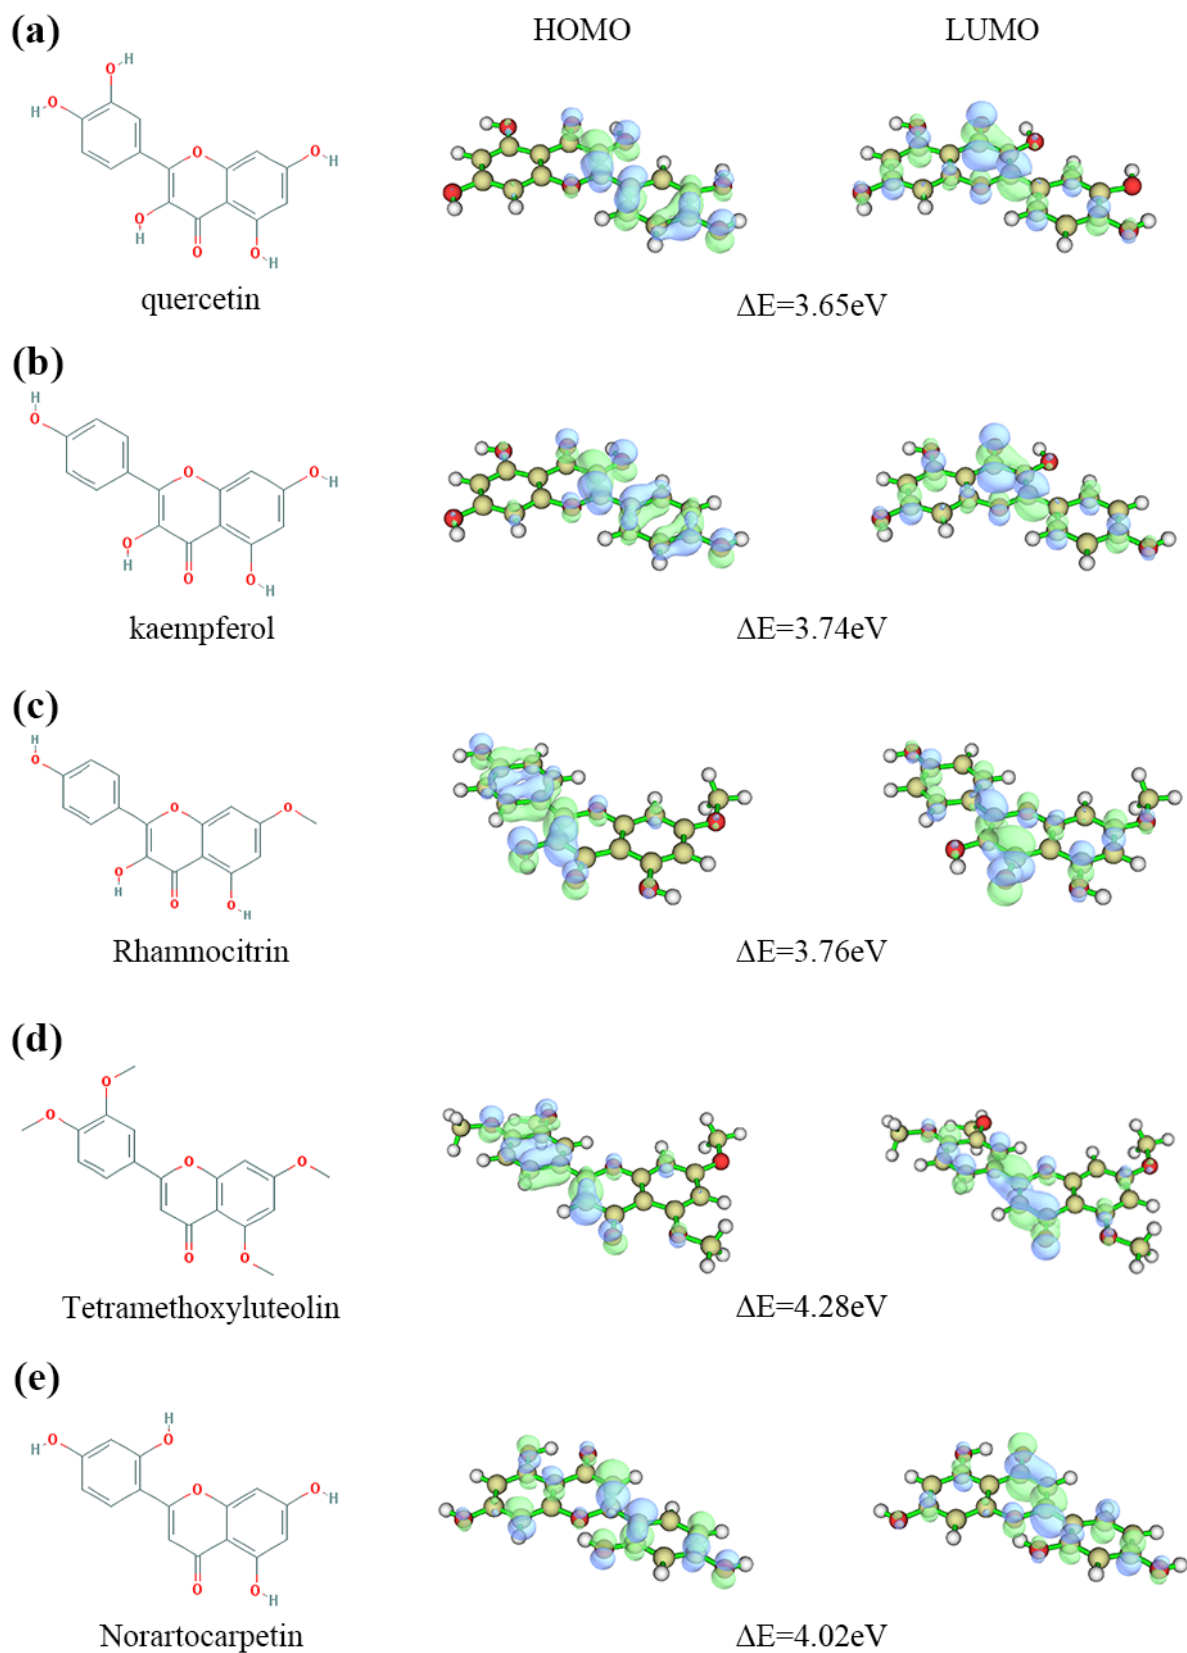

Figure S1. Molecular structure and HOMO-LUMO orbital diagram of (a) quercetin, (b) kaempferol, (c) rhamnocitrin, (d) tetramethoxyluteolin, and (e) norartocarpetin.
