# Supplementary material for: Mulberry Leaf Compounds and Gut Microbiota in Alzheimer’s Disease and Diabetes: A Study Using Network Pharmacology, Molecular Dynamics Simulation, and Cellular Assays
Source: MDPI journal article supplement (doi:10.3390/ijms25074062), 2024-04-05
Supplement: s1 [file s1]

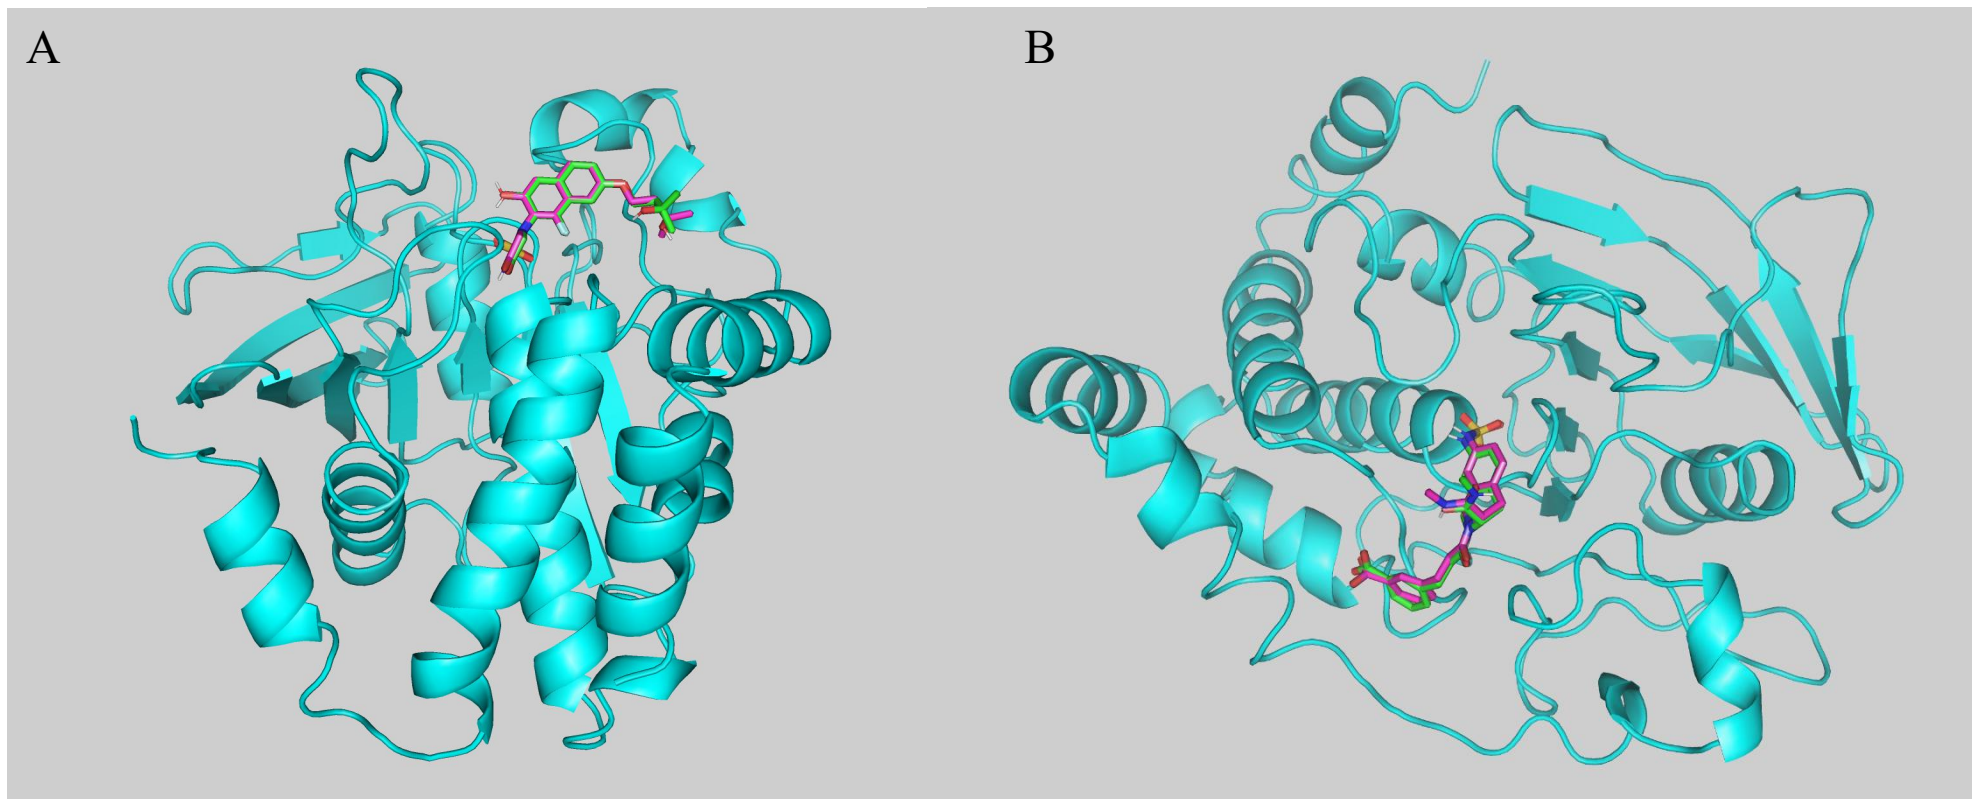

Figure S2. Docking validation of AutoDock Vina 1.2.0. (A) The original ligand position (pink) for PDB code 8SKL and the ligand position after AutoDock docking (green). RMSD = 0.84 Å. (B) The original ligand position (pink) for PDB code 2F71 and the ligand position after AutoDock docking (green). RMSD = 0.87 Å.
