# Supplementary material for: Mulberry Leaf Compounds and Gut Microbiota in Alzheimer’s Disease and Diabetes: A Study Using Network Pharmacology, Molecular Dynamics Simulation, and Cellular Assays
Source: MDPI journal article supplement (doi:10.3390/ijms25074062), 2024-04-05
Supplement: s1 [file s1]

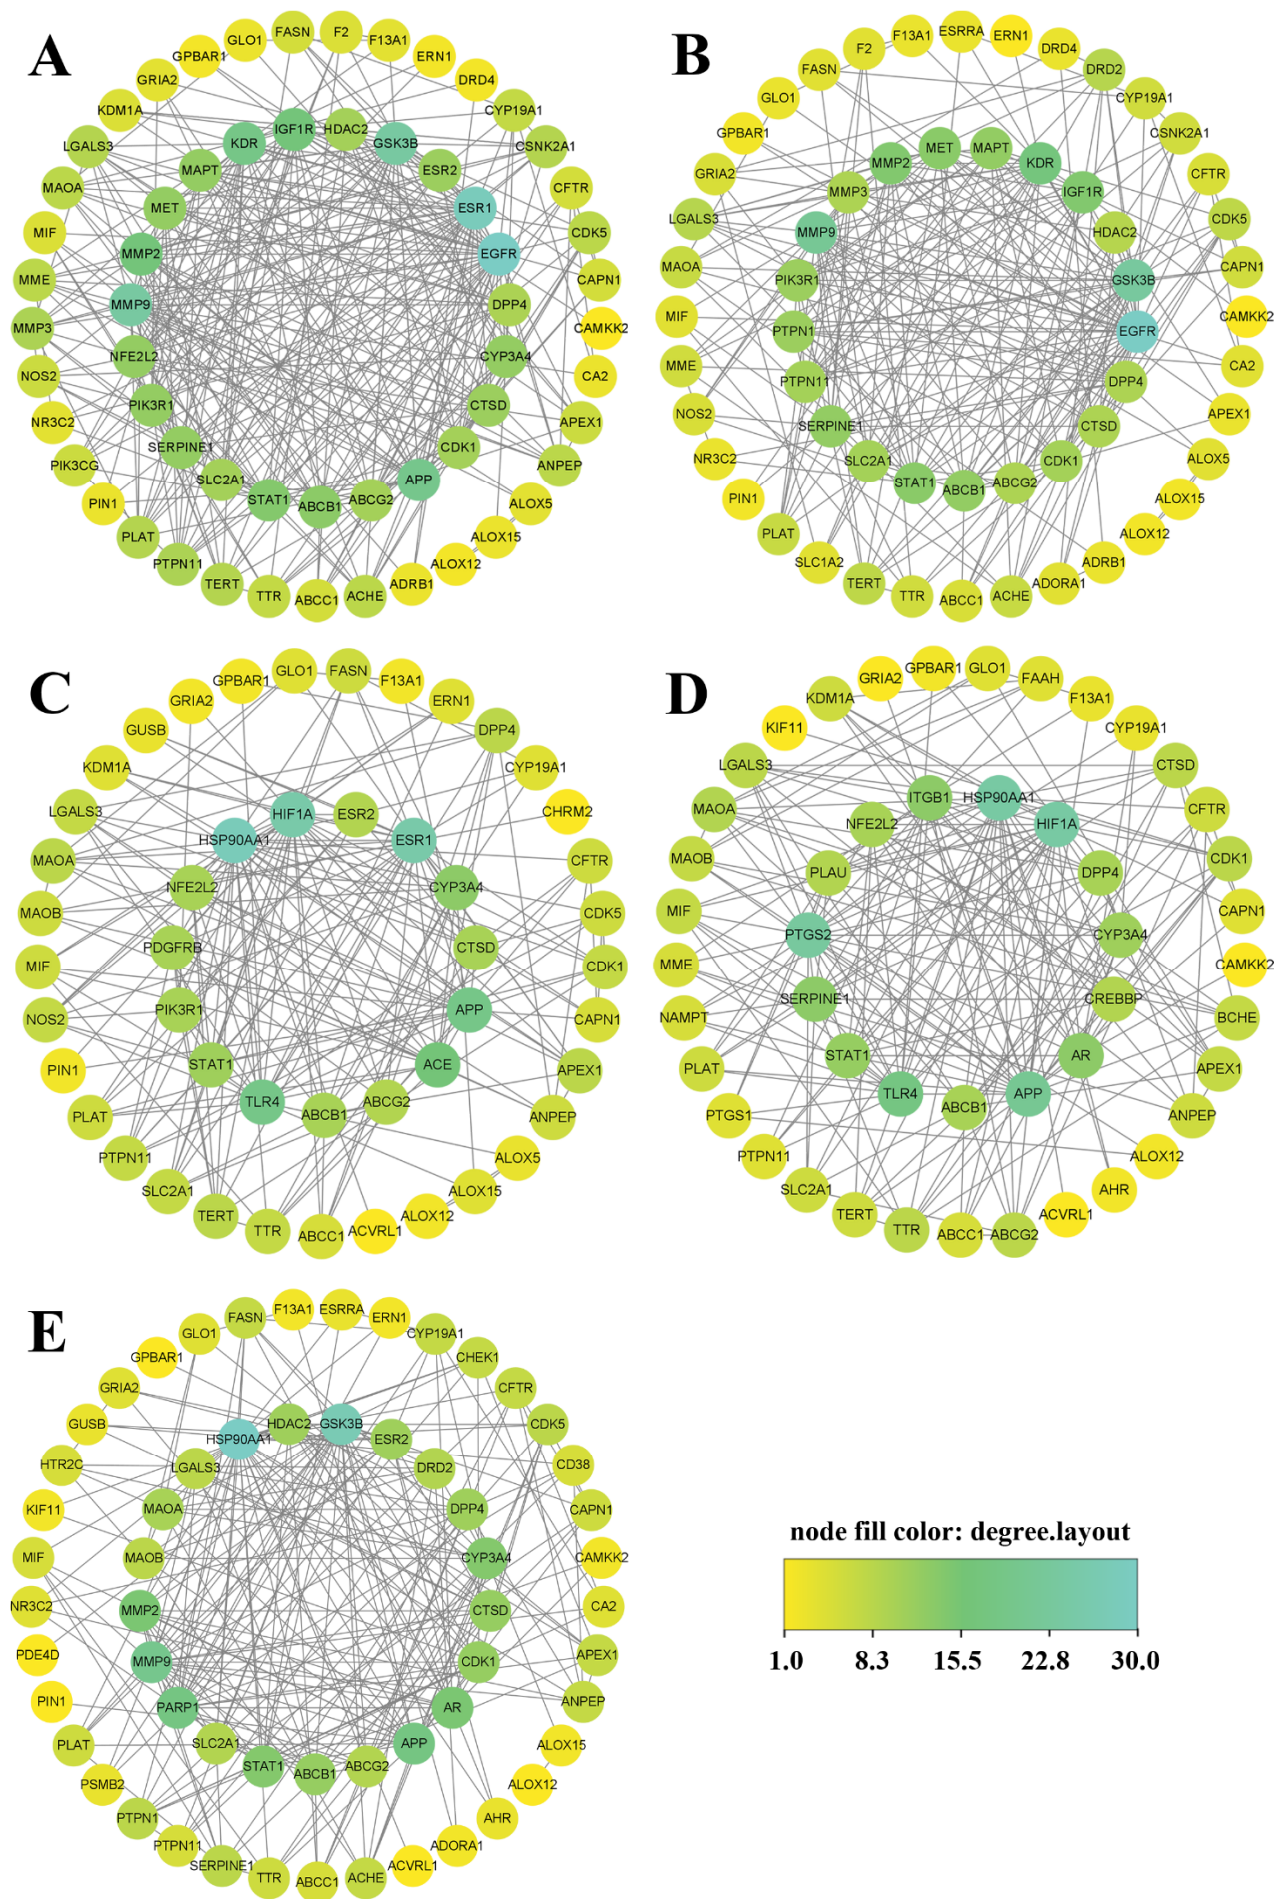

**Figure S1.** PPI network of (A) quercetin, (B) kaempferol, (C) rhamnocitrin, (D) tetramethoxyluteolin, (E) norartocarpetin.
