# Supplementary material for: Mulberry Leaf Compounds and Gut Microbiota in Alzheimer’s Disease and Diabetes: A Study Using Network Pharmacology, Molecular Dynamics Simulation, and Cellular Assays
Source: Int J Mol Sci. 2024 Apr 5;25(7):4062. doi: 10.3390/ijms25074062 (PMC11012793; doi:10.3390/ijms25074062)
Supplement: Supplementary file 1 [file ijms-25-04062-s001.zip]

Archive with 9 entries (9 files):
- Figure S1_PPI.pdf
- Figure S2_HOMO-LUMO.pdf
- Figure S3_8SKL.pdf
- Figure S4_ADMET of quercetin.pdf
- Figure S5_ADMET of kaempferol.pdf
- Figure S6_docking validation.pdf
- Table S1.xls
- Table S2.xls
- Table S3.xls
