# Supplementary material for: Mulberry Leaf Compounds and Gut Microbiota in Alzheimer’s Disease and Diabetes: A Study Using Network Pharmacology, Molecular Dynamics Simulation, and Cellular Assays
Source: Int J Mol Sci. 2024 Apr 5;25(7):4062. doi: 10.3390/ijms25074062 (PMC11012793; doi:10.3390/ijms25074062)
Supplement: Supplementary file 1 [file ijms-25-04062-s001.zip › Table S1.xls]

## Sheet: clustered_data
Molecule ID	Smiles	cluster	core molecule	Dimension 1	Dimension 2	Dimension 3
MOL000012	CCCCCCCCCCCCCCCCCCCC(=O)O	1	1,8-cineole	-16.2704	0.374826	-0.638643
MOL000069	CCCCCCCCCCCCCCCC(=O)O	1	1,8-cineole	-17.1608	3.13566	1.53886
MOL000116	CCCCCCCCC=O	1	1,8-cineole	-9.76368	8.94935	1.24637
MOL000122	CC1(C)O[C@]2(C)CC[C@H]1CC2	1	1,8-cineole	-12.6273	-0.914496	7.75778
MOL000388	NCCCC(=O)O	1	1,8-cineole	-10.0669	1.43612	-4.07572
MOL000394	C[N+](C)(C)CCO	1	1,8-cineole	-3.77452	1.33283	-0.404115
MOL000399	CCCCCCCCCCCCCCCCCCCCCC(=O)O	1	1,8-cineole	-16.6302	3.02883	-1.38391
MOL000508	C[C@H]1C(=O)CC[C@@H]2[C@]1(C)CC[C@H]1[C@@]2(C)CC[C@@]2(C)[C@@H]3CC(C)(C)CC[C@]3(C)CC[C@]12C	1	1,8-cineole	-11.0594	10.9667	1.32827
MOL000659	CCCCCCCCCCCCCCCCCCCCCCCCCCCC(=O)O	1	1,8-cineole	-16.8023	1.98185	0.0416185
MOL000661	CCCCCCCCCCCCCCCCCCCCCCCCC(=O)O	1	1,8-cineole	-15.744	0.796396	0.826678
MOL000662	CCCCCCCCCCCCCCCCCCCCCCCCCC(=O)O	1	1,8-cineole	-17.9493	0.739957	-0.166954
MOL000663	CCCCCCCCCCCCCCCCCCCCCCCC(=O)O	1	1,8-cineole	-17.7742	3.55242	-0.0434295
MOL000666	CCCCCC=O	1	1,8-cineole	-9.71307	8.10446	-0.156352
MOL000667	CCCCCCO	1	1,8-cineole	-9.22072	1.30679	4.8356
MOL000775	CCOC(C)=O	1	1,8-cineole	-6.46651	-0.97623	-1.35048
MOL000776	CCO	1	1,8-cineole	-4.88502	1.72057	0.914561
MOL000860	CCCCCCCCCCCCCCCCCC(=O)O	1	1,8-cineole	-15.5576	2.37505	1.28017
MOL000875	C[C@@H]1CC[C@H]2C(C)(C)[C@H]3C[C@@]12CC[C@@]3(C)O	1	1,8-cineole	-11.4697	0.419918	7.92849
MOL000879	CCCCCCCCCCCCCCCC(=O)OC	1	1,8-cineole	-18.0119	-0.809791	2.0744
MOL000971	CCCCCCCCCCCCCCCC(=O)OCC	1	1,8-cineole	-17.3125	-2.14562	2.17168
MOL001230	CCCCCCCCCCCO	1	1,8-cineole	-9.90886	0.75524	5.00594
MOL001393	CCCCCCCCCCCCCC(=O)O	1	1,8-cineole	-17.1345	1.42302	1.6586
MOL001487	CC(=O)CCC[C@@H](C)CCC[C@H](C)CCCC(C)C	1	1,8-cineole	-10.5607	9.35447	-0.322113
MOL001501	CCCCCCCCCCCCCCCCC(=O)O	1	1,8-cineole	-15.9643	3.54874	0.117308
MOL001993	CCCCCCCCCCCCCCCCCCCCCCC(=O)O	1	1,8-cineole	-18.3495	2.2013	-0.984935
MOL002046	CCCCCC(=O)O	1	1,8-cineole	-15.1235	1.94932	-0.738607
MOL002301	C[C@@H](O)C(=O)O	1	1,8-cineole	-8.28657	1.13469	-0.814009
MOL002379	CCCCC=O	1	1,8-cineole	-8.31821	7.3006	-0.376373
MOL002691	CC(C)CC(=O)O	1	1,8-cineole	-10.0746	1.12915	-1.70507
MOL002885	CCCCC(=O)O	1	1,8-cineole	-12.8378	1.77936	-1.22511
MOL002943	CCCCO	1	1,8-cineole	-6.81038	1.63527	2.92851
MOL003040	CCCCCO	1	1,8-cineole	-8.09559	1.1244	3.82793
MOL003416	CC(C)C=O	1	1,8-cineole	-6.34736	4.80476	-1.4752
MOL003869	CC1(C)C[C@@]23C[C@@H]1CC[C@]2(C)CC[C@H](O)[C@@]3(C)O	1	1,8-cineole	-11.8604	0.899642	7.86017
MOL003873	O[C@H]1[C@H](O)[C@H](O)[C@@H](O)[C@H](O)[C@H]1O	1	1,8-cineole	-10.5914	2.0861	6.66762
MOL003877	CC(C)CCO	1	1,8-cineole	-7.06298	0.632627	2.61404
MOL004320	CCC(C)=O	1	1,8-cineole	-6.68727	5.47316	-0.0966432
MOL004470	CCC(=O)O	1	1,8-cineole	-7.75061	2.36024	-1.90909
MOL004472	CC(C)=O	1	1,8-cineole	-5.47831	4.38155	-0.511275
MOL004480	CC(=O)O	1	1,8-cineole	-6.07558	1.48452	-1.21378
MOL004687	CCCCCCC(C)=O	1	1,8-cineole	-9.41444	9.62824	0.216299
MOL004734	CCCC=O	1	1,8-cineole	-7.95573	5.58417	-0.900848
MOL004739	C[C@@H](N)C(=O)O	1	1,8-cineole	-8.3188	1.45229	-3.66582
MOL005121	CCCCCCCCCCCCCCCCCC=O	1	1,8-cineole	-10.8885	8.65081	0.717054
MOL005554	CC(C)CO	1	1,8-cineole	-5.70763	1.17086	1.71956
MOL005570	O[C@H]1[C@H](O)[C@@H](O)[C@H](O)[C@@H](O)[C@H]1O	1	1,8-cineole	-11.1939	2.00398	6.24281
MOL005971	CCCCCCCCCCCCCCCCCCC(=O)O	1	1,8-cineole	-18.5215	2.07754	0.838151
MOL008284	CCCC(=O)O	1	1,8-cineole	-10.0061	2.34065	-1.8749
MOL008401	CCCCCCCCCCCCCCCCCCCCC(=O)O	1	1,8-cineole	-16.9549	1.39143	-1.69782
MOL008672	CC[C@H](C)C=O	1	1,8-cineole	-6.98766	6.38415	-1.2818
MOL009844	CC(=O)OCCC(C)C	1	1,8-cineole	-7.31529	-2.57938	-0.802331
MOL010208	CC[C@@H](C)CCCCCCC(=O)OC	1	1,8-cineole	-17.6888	-1.43229	0.93302
MOL010336	N[C@H](CC(=O)O)C(=O)O	1	1,8-cineole	-9.86636	1.30253	-5.23124
MOL010784	CC(C)C(=O)O	1	1,8-cineole	-7.62003	1.0659	-1.95934
MOL011564	CC(=O)[C@@H](C)O	1	1,8-cineole	-8.24098	2.64386	-0.375057
MOL000023	C=C(C)[C@H]1CC=C(C)CC1	2	cis-beta-Ocimene	3.24403	0.611188	14.8177
MOL000035	C=C(C)[C@@H]1CC[C@@]2(C)CCCC(=C)[C@@H]2C1	2	cis-beta-Ocimene	0.508356	4.06506	14.688
MOL000201	C=C/C(C)=C/CC=C(C)C	2	cis-beta-Ocimene	6.80796	2.58909	7.0749
MOL000208	C=C1CC[C@@H]2[C@H]([C@@H]3[C@H](C)CC[C@@H]13)C2(C)C	2	cis-beta-Ocimene	0.576152	4.71756	15.9141
MOL000234	C=C(C)[C@@H]1CC=C(C)CC1	2	cis-beta-Ocimene	3.50716	-0.540246	15.6577
MOL000479	C=CC(=C)CC/C=C(\C)CCC=C(C)C	2	cis-beta-Ocimene	4.25606	-2.18408	13.5523
MOL000485	CC1=CC[C@@H]2C[C@H]1C2(C)C	2	cis-beta-Ocimene	1.75332	1.98224	15.2605
MOL000720	CC1=C(C=O)C(C)(C)CC=C1	2	cis-beta-Ocimene	7.0911	-1.82635	18.749
MOL000724	CC(=O)CC/C=C(\C)CCC=C(C)C	2	cis-beta-Ocimene	4.36188	-4.65399	12.2309
MOL000905	C=C1CC[C@@H]2C[C@H]1C2(C)C	2	cis-beta-Ocimene	1.46758	4.76838	14.8563
MOL000914	CC1=CC[C@@]2(C(C)C)C[C@@H]12	2	cis-beta-Ocimene	2.88851	2.36718	15.969
MOL000926	C=CC(=C)CC/C=C(/C)CCC=C(C)C	2	cis-beta-Ocimene	4.49829	-1.50136	12.7055
MOL000932	C=C/C(C)=C/C/C=C(\C)CCC=C(C)C	2	cis-beta-Ocimene	6.24872	-1.18313	13.3278
MOL001110	C=C/C(C)=C\CC=C(C)C	2	cis-beta-Ocimene	7.15655	2.37659	7.39299
MOL001382	CC(=O)/C=C/C=C(C)C	2	cis-beta-Ocimene	6.36825	-0.522737	6.63406
MOL001506	CC(C)=CCC/C(C)=C/CC/C(C)=C/CC/C=C(\C)CC/C=C(\C)CCC=C(C)C	2	cis-beta-Ocimene	3.3389	-1.88261	12.7068
MOL001556	C=C1CC/C=C(/C)CC[C@@H]2[C@@H]1CC2(C)C	2	cis-beta-Ocimene	2.51759	0.535022	16.5802
MOL001562	C=CCCCCCCCCCCCCCCCCC	2	cis-beta-Ocimene	1.03891	5.80669	11.7547
MOL001622	C=CCCCCCCCCCCCC	2	cis-beta-Ocimene	-0.0151509	5.33007	11.7944
MOL002128	C=C(C)C1=CC=C(C)CC1	2	cis-beta-Ocimene	5.5484	1.23565	17.2292
MOL002363	CC(=O)/C=C/C1=C(C)CCCC1(C)C	2	cis-beta-Ocimene	5.89859	-0.45119	18.9624
MOL002496	CC(=O)CCC=C(C)C	2	cis-beta-Ocimene	4.48521	-4.43723	11.0603
MOL002675	CCC/C=C/C=O	2	cis-beta-Ocimene	4.13673	-1.18014	8.14413
MOL002773	CC1=C(/C=C/C(C)=C/C=C/C(C)=C/C=C/C=C(C)/C=C/C=C(C)/C=C/C2=C(C)CCCC2(C)C)C(C)(C)CCC1	2	cis-beta-Ocimene	4.90714	1.3292	17.9901
MOL002972	C=C(CCC=C(C)C)[C@@H]1CC=C(C)CC1	2	cis-beta-Ocimene	2.27823	-0.421449	15.0236
MOL003520	C/C=C\C(=O)C1=C(C)C=CCC1(C)C	2	cis-beta-Ocimene	6.92978	-1.67152	19.3759
MOL003839	C=C(C)[C@H]1CCC(C=O)=C2CC[C@@H](C)[C@H]2C1	2	cis-beta-Ocimene	2.98769	-0.700669	19.2567
MOL003935	C=C/C(C)=C/C=C/C(=C)C	2	cis-beta-Ocimene	6.6505	1.18436	6.68418
MOL004294	CC(C)=CCCc1ccoc1	2	cis-beta-Ocimene	2.313	1.1908	9.19532
MOL004723	C=C1CC=C(C(C)C)CC1	2	cis-beta-Ocimene	4.70469	0.527121	14.9075
MOL004768	C/C=C/CCC	2	cis-beta-Ocimene	2.80987	-0.34378	9.77542
MOL005477	C=CCCCCCCCCCCCCCCCCCC	2	cis-beta-Ocimene	0.202525	6.30019	12.3687
MOL005967	C1=CCCCC1	2	cis-beta-Ocimene	2.51329	0.71244	13.1589
MOL006702	C[C@@H]1C=C[C@H]2[C@@H](C1)C2(C)C	2	cis-beta-Ocimene	1.93568	2.11581	16.9618
MOL011148	CC(C)=CCC[C@]1(C)[C@H]2CC=C(C)[C@@H]1C2	2	cis-beta-Ocimene	1.06493	1.25841	16.1995
MOL011598	CC(=O)CC/C=C(/C)CCC=C(C)C	2	cis-beta-Ocimene	5.08809	-4.47042	12.0801
MOL013022	CC/C=C/C=C/C(C)=O	2	cis-beta-Ocimene	5.97499	-0.354087	6.29557
MOL000027	CC(C)=CCC[C@@H](C)c1ccc(C)cc1	3	alpha-Ionene	9.13071	9.96305	-9.30535
MOL000105	O=C(O)c1ccc(O)c(O)c1	3	alpha-Ionene	2.6911	5.55988	-14.7776
MOL000114	COc1cc(C(=O)O)ccc1O	3	alpha-Ionene	3.13366	4.79197	-15.6317
MOL000207	C=CCc1ccc(OC)c(OC)c1	3	alpha-Ionene	8.58908	4.26589	-16.132
MOL000254	C=CCc1ccc(O)c(OC)c1	3	alpha-Ionene	8.75796	4.68863	-15.6609
MOL000475	C/C=C/c1ccc(OC)cc1	3	alpha-Ionene	6.8065	2.16645	-13.3789
MOL000607	C=C(C)c1ccc(C)cc1	3	alpha-Ionene	8.49006	8.73802	-10.177
MOL000635	COc1cc(C=O)ccc1O	3	alpha-Ionene	3.88718	3.93493	-15.451
MOL000699	Cc1cccc(C(C)C)c1	3	alpha-Ionene	6.80982	9.20537	-10.0073
MOL000708	O=Cc1ccccc1	3	alpha-Ionene	4.92845	8.00068	-12.1989
MOL000714	O=CCc1ccccc1	3	alpha-Ionene	6.74237	9.57231	-11.7885
MOL000719	COC(=O)c1ccccc1O	3	alpha-Ionene	1.76486	6.38051	-14.6683
MOL000729	Cn1c(=O)c2c3c(ccc2c2ccc4cc5c(cc4c21)OCO5)OCO3	3	alpha-Ionene	3.37076	2.58534	-16.1694
MOL000874	COc1ccc(C(C)=O)c(O)c1	3	alpha-Ionene	5.96938	3.98834	-15.7592
MOL001050	Cc1cccc(O)c1	3	alpha-Ionene	5.1639	4.66166	-12.62
MOL001099	Cc1ccc(C)cc1	3	alpha-Ionene	4.85267	7.99991	-10.2004
MOL001300	OCCc1ccccc1	3	alpha-Ionene	5.35546	10.0677	-10.9086
MOL001335	OCc1ccccc1	3	alpha-Ionene	3.42335	7.4425	-11.192
MOL001578	CC(=O)c1ccccc1	3	alpha-Ionene	6.02232	8.95884	-12.3748
MOL001856	Cc1cc(C)cc(C)c1	3	alpha-Ionene	5.9511	7.36248	-10.3239
MOL002361	C=CCc1ccc(OC)cc1	3	alpha-Ionene	7.99094	4.05369	-15.1658
MOL002373	Cc1c(O)cc2c(c1C)O[C@](C)(CCC[C@H](C)CCC[C@H](C)CCCC(C)C)CC2	3	alpha-Ionene	11.607	7.8918	-22.4098
MOL002771	Cc1c(C)c2c(c(C)c1O)CC[C@@](C)(CCC[C@H](C)CCC[C@H](C)CCCC(C)C)O2	3	alpha-Ionene	11.3907	8.3982	-23.1715
MOL002775	Cc1cc(O)c(C)c2c1O[C@](C)(CCC[C@H](C)CCC[C@H](C)CCCC(C)C)CC2	3	alpha-Ionene	11.101	7.53705	-23.1155
MOL002830	Cc1ccc(O)cc1	3	alpha-Ionene	4.29839	5.01284	-12.0405
MOL002983	COc1ccccc1O	3	alpha-Ionene	4.58461	2.59965	-11.732
MOL002998	Oc1ccccc1	3	alpha-Ionene	4.4251	3.82705	-10.9148
MOL003493	c1ccc2ccccc2c1	3	alpha-Ionene	4.38846	6.06991	-8.44944
MOL003502	COc1cc(C[C@@]2(O)COc3cc(O)ccc3[C@@H]2O)ccc1O	3	alpha-Ionene	8.74458	8.05178	-22.53
MOL003840	COC(=O)c1c2c(c3ccccc3c1O)OC(C)(C)[C@H](O)[C@H]2OC	3	alpha-Ionene	8.15486	8.37892	-22.9288
MOL003846	COc1cc(=O)n(C)c2c(OC[C@H](O)C(C)(C)O)cccc12	3	alpha-Ionene	7.99185	-1.18825	-14.1575
MOL003848	COc1cc2c3c(c1OC)Oc1ccc(cc1)C[C@H]1c4c(cc(OC)c5c4Oc4ccc(cc4CO5)C[C@H]3N(C)CC2)CCN1C	3	alpha-Ionene	9.65073	6.34288	-20.5181
MOL003865	COc1cc(O)cc2ccc3cccc(O)c3c12	3	alpha-Ionene	4.27804	1.91094	-10.8591
MOL003870	C[n+]1cccc(C(=O)[O-])c1	3	alpha-Ionene	1.15412	7.56787	-11.6377
MOL003879	CC(C)=CCc1c(O)cc(/C=C\c2ccc(O)cc2)cc1O	3	alpha-Ionene	11.4914	5.21114	-11.2978
MOL004479	Cc1ccccc1O	3	alpha-Ionene	5.32651	5.09394	-11.5556
MOL004582	Cc1cccc2ccccc12	3	alpha-Ionene	4.88758	6.93328	-9.31229
MOL004881	CC(C)=CCc1c(O)ccc(C(=O)/C=C/c2ccc(O)cc2O)c1O	3	alpha-Ionene	12.9474	3.87064	-11.289
MOL005009	CC(C)=CCc1c(O)ccc(C(=O)/C=C/c2ccc(O)cc2)c1O	3	alpha-Ionene	12.7746	4.03899	-11.286
MOL005110	Cc1ccc2c(c1)CCCC2(C)C	3	alpha-Ionene	7.44251	10.0836	-8.37041
MOL005571	Cc1ccc(C)c(C)c1	3	alpha-Ionene	5.81766	8.10901	-9.30114
MOL007461	Cc1ccc(C)c2c1C=CC[C@H]2C	3	alpha-Ionene	10.9367	8.55849	-9.06192
MOL010419	Cc1cc(O)cc2c1O[C@](C)(CCC[C@H](C)CCC[C@H](C)CCCC(C)C)CC2	3	alpha-Ionene	10.7483	8.18758	-22.4287
MOL013163	C1=Cc2ccccc2C1	3	alpha-Ionene	10.653	7.76401	-9.85975
MOL000040	COc1cc2ccc(=O)oc2cc1O	4	4-Hydroxycoumarin	10.3055	-5.24273	-16.2792
MOL000476	COc1cc(O)c2c(c1)C(=O)c1cc(C)cc(O)c1C2=O	4	4-Hydroxycoumarin	3.51165	0.18334	-20.727
MOL000726	Cc1ccc2c(c1O)C(=O)c1ccc(O[C@@H]3O[C@H](CO[C@@H]4O[C@@H](C)[C@H](O)[C@@H](O)[C@H]4O)[C@@H](O)[C@H](O)[C@H]3O)c(O)c1C2=O	4	4-Hydroxycoumarin	4.38933	-3.25687	-21.6558
MOL001945	COc1c2ccoc2cc2oc(=O)ccc12	4	4-Hydroxycoumarin	11.7343	-4.83406	-17.7894
MOL001955	O=C(/C=C/c1ccc(O)c(O)c1)O[C@@H]1C[C@](O)(C(=O)O)C[C@@H](O)[C@H]1O	4	4-Hydroxycoumarin	4.88651	-6.02514	-11.8626
MOL002218	COc1cc2ccc(=O)oc2cc1O[C@H]1O[C@H](CO)[C@@H](O)[C@@H](O)[C@@H]1O	4	4-Hydroxycoumarin	6.37144	-6.78139	-20.503
MOL002558	O=c1ccc2ccc(O)cc2o1	4	4-Hydroxycoumarin	11.2487	-5.01556	-15.1781
MOL002669	COc1cc(/C=C/C(=O)O[C@H]2CC[C@@]3(C)C(=CC[C@H]4[C@H]5CC[C@H]([C@@H](C)CC[C@@H](C)C(C)C)[C@@]5(C)CC[C@@H]43)C2)ccc1O	4	4-Hydroxycoumarin	6.6477	-5.37097	-12.2524
MOL002902	CCOC(=O)/C=C/c1ccc(O)c(O)c1	4	4-Hydroxycoumarin	7.42152	-3.91116	-13.3027
MOL003847	C[C@@H]1C(=O)c2c(c3c(c4c(-c5ccccc5)cc(=O)oc24)OC(C)(C)C=C3)O[C@@H]1C	4	4-Hydroxycoumarin	15.7004	-7.45737	-15.4019
MOL003849	COc1c(C)c(O)c(C(C)=O)c(O)c1Cc1c(O)c2c(c(C(=O)C(C)C)c1O)OC(C)(C)C=C2	4	4-Hydroxycoumarin	15.5086	-7.07234	-15.367
MOL003854	Cc1cc2c([nH]c3ccc(O)c(-c4c(O)ccc5[nH]c6c7c(c(C)cc6c45)OC(C)(C)C=C7)c32)c2c1OC(C)(C)C=C2	4	4-Hydroxycoumarin	13.9294	-3.15737	-14.65
MOL003863	CC(C)=CCc1c2c(c(O)c3c1O[C@]14C(=C[C@@H]5C[C@H]1C(C)(C)O[C@@]4(C/C=C(/C)C(=O)O)C5=O)C3=O)C=CC(C)(C)O2	4	4-Hydroxycoumarin	16.4413	-9.47929	-15.1002
MOL003864	Cc1ccc2c(c1O)C(=O)c1ccc(O)c(O)c1C2=O	4	4-Hydroxycoumarin	3.42924	0.285208	-20.726
MOL003867	COc1ccc(C(C)=O)c(O[C@@H]2O[C@H](CO[C@@H]3OC[C@H](O)[C@H](O)[C@H]3O)[C@@H](O)[C@H](O)[C@H]2O)c1	4	4-Hydroxycoumarin	4.85326	-4.1288	-21.5685
MOL003871	C[C@]1(OC(=O)/C=C/c2ccc(O)c(O)c2)[C@H](O)[C@@H](O)C[C@]1(O)C(=O)O	4	4-Hydroxycoumarin	4.84601	-6.04639	-11.8475
MOL003872	O=c1cc(O)c2ccccc2o1	4	4-Hydroxycoumarin	10.9032	-3.37615	-15.4326
MOL003875	C=C1C=Cc2ccc(O)cc2O1	4	4-Hydroxycoumarin	12.6347	-4.47935	-14.5947
MOL003880	O=c1ccc2c(O)cccc2o1	4	4-Hydroxycoumarin	11.5109	-4.21892	-16.2105
MOL003881	O=c1ccc2cc(O)ccc2o1	4	4-Hydroxycoumarin	10.2137	-4.41795	-15.3558
MOL012682	O=c1ccc2c(O)cc(O)cc2o1	4	4-Hydroxycoumarin	11.6508	-5.2473	-16.0635
MOL013074	COc1cc2ccc(=O)oc2cc1O[C@@H]1O[C@H](CO)[C@@H](O)[C@H](O)[C@H]1O	4	4-Hydroxycoumarin	6.7516	-6.66323	-20.8446
MOL013083	O=c1ccc2ccc(O[C@@H]3O[C@H](CO)[C@@H](O)[C@H](O)[C@H]3O)cc2o1	4	4-Hydroxycoumarin	6.20788	-5.95799	-20.8102
MOL000057	CC(C)COC(=O)c1ccccc1C(=O)OCC(C)C	5	DIBP	-3.5591	9.40147	-16.0262
MOL000061	O=C(O)[C@@H]1CCCN1	5	DIBP	-11.2069	0.867352	-8.33188
MOL000433	Nc1nc2ncc(CNc3ccc(C(=O)N[C@@H](CCC(=O)O)C(=O)O)cc3)nc2c(=O)[nH]1	5	DIBP	-11.2695	2.44416	-11.1903
MOL000676	CCCCOC(=O)c1ccccc1C(=O)OCCCC	5	DIBP	-4.10858	9.57076	-15.2013
MOL002095	CCOC(=O)c1ccccc1C(=O)OCC	5	DIBP	-2.7676	9.33059	-15.6076
MOL003845	Nc1nc(O)c2c(n1)N[C@@H](CNc1ccc(C(=O)N[C@H](CCC(=O)O)C(=O)O)cc1)CN2C=O	5	DIBP	-10.3822	0.872581	-9.3404
MOL003876	Nc1nc2c(c(=O)[nH]1)N(C=O)[C@@H](CNc1ccc(C(=O)N[C@H](CCC(=O)O)C(=O)O)cc1)CN2	5	DIBP	-11.1345	2.09563	-10.7401
MOL004729	OC[C@H]1NC[C@H](O)[C@@H](O)[C@@H]1O	5	DIBP	-13.2433	-1.2006	-8.36923
MOL004736	OC[C@H]1NCC[C@@H](O)[C@@H]1O	5	DIBP	-13.1107	-1.06563	-8.33269
MOL005472	CCCC[C@@H](CC)COC(=O)c1ccccc1C(=O)O	5	DIBP	-4.90458	9.49563	-15.8117
MOL010257	CC(C)CCOC(=O)c1ccccc1	5	DIBP	-4.0903	8.45419	-15.11
MOL000098	O=c1c(O)c(-c2ccc(O)c(O)c2)oc2cc(O)cc(O)c12	6	tectorigenin	13.9897	-15.4719	-12.9112
MOL000251	COc1cc(O)c2c(=O)c(O)c(-c3ccc(O)cc3)oc2c1	6	tectorigenin	14.2719	-15.2503	-13.8769
MOL000415	C[C@@H]1O[C@@H](OC[C@H]2O[C@@H](Oc3c(-c4ccc(O)c(O)c4)oc4cc(O)cc(O)c4c3=O)[C@H](O)[C@@H](O)[C@@H]2O)[C@H](O)[C@H](O)[C@H]1O	6	tectorigenin	11.5009	-20.0087	-14.0318
MOL000422	O=c1c(O)c(-c2ccc(O)cc2)oc2cc(O)cc(O)c12	6	tectorigenin	14.9306	-15.5605	-13.2378
MOL000437	O=c1c(O[C@@H]2O[C@H](CO)[C@@H](O)[C@H](O)[C@H]2O)c(-c2ccc(O)c(O)c2)oc2cc(O)cc(O)c12	6	tectorigenin	11.4535	-18.9627	-13.4844
MOL000561	O=c1c(O[C@@H]2O[C@H](CO)[C@@H](O)[C@H](O)[C@H]2O)c(-c2ccc(O)cc2)oc2cc(O)cc(O)c12	6	tectorigenin	11.5424	-18.8845	-14.6075
MOL000738	CC(C)=CCc1c(-c2ccc(O)cc2O)oc2c(CC=C(C)C)c(O)cc(O)c2c1=O	6	tectorigenin	16.5462	-12.8106	-13.7862
MOL001695	O=c1c(O)c(-c2ccc(O)c(O)c2)oc2cc(O[C@@H]3O[C@H](CO)[C@@H](O)[C@H](O)[C@H]3O)cc(O)c12	6	tectorigenin	12.9358	-17.278	-13.9414
MOL002693	C[C@@H]1O[C@@H](OC[C@H]2O[C@@H](Oc3c(-c4ccc(O)cc4)oc4cc(O)cc(O)c4c3=O)[C@H](O)[C@@H](O)[C@@H]2O)[C@H](O)[C@H](O)[C@H]1O	6	tectorigenin	12.4209	-19.5591	-14.6508
MOL003759	COc1cc(-c2coc3cc(O)c(OC)c(O)c3c2=O)ccc1O	6	tectorigenin	12.7419	-11.3264	-7.98756
MOL003767	COc1c(O)cc2occ(-c3ccc(O)cc3)c(=O)c2c1O	6	tectorigenin	12.7434	-11.3268	-7.99244
MOL003853	CC(C)=CCc1c(O)ccc(C(=O)[C@@H]2[C@@H](c3c(O)cc(O)c4c(=O)c(CC=C(C)C)c(-c5ccc(O)cc5O)oc34)C=C(C)C[C@H]2c2ccc(O)cc2O)c1O	6	tectorigenin	17.0686	-12.7032	-13.7978
MOL004110	O=c1c(O[C@@H]2O[C@H]([C@H](O)CO)[C@H](O)[C@H]2O)c(-c2ccc([O-])c(O)c2)oc2cc(O)cc(O)c12	6	tectorigenin	12.4714	-19.4241	-13.5163
MOL006630	O=c1cc(-c2ccc(O)cc2O)oc2cc(O)cc(O)c12	6	tectorigenin	15.1477	-14.1176	-13.3924
MOL007879	COc1cc(OC)c2c(=O)cc(-c3ccc(OC)c(OC)c3)oc2c1	6	tectorigenin	14.2832	-14.2025	-12.7319
MOL012720	CC(C)(O)CCc1c(-c2ccc(O)cc2O)oc2cc3c(c(O)c2c1=O)C=CC(C)(C)O3	6	tectorigenin	16.4135	-11.586	-14.3325
MOL000131	CCCCC/C=C\C/C=C\CCCCCCCC(=O)O	7	linolenic acid	-3.17462	-12.0649	15.2189
MOL000263	CC1(C)CC[C@]2(C(=O)O)CC[C@]3(C)C(=CC[C@@H]4[C@@]5(C)CC[C@H](O)C(C)(C)[C@@H]5CC[C@]43C)[C@@H]2C1	7	linolenic acid	-6.72168	-9.51733	20.7814
MOL000357	CC[C@H](CC[C@@H](C)[C@H]1CC[C@H]2[C@@H]3CC=C4C[C@@H](O[C@@H]5O[C@H](CO)[C@@H](O)[C@H](O)[C@H]5O)CC[C@]4(C)[C@H]3CC[C@]12C)C(C)C	7	linolenic acid	-13.5035	-7.17314	13.5195
MOL000358	CC[C@H](CC[C@@H](C)[C@H]1CC[C@H]2[C@@H]3CC=C4C[C@@H](O)CC[C@]4(C)[C@H]3CC[C@]12C)C(C)C	7	linolenic acid	-6.56763	-4.74203	18.8882
MOL000361	CC1(C)CC[C@]2(C)CC[C@]3(C)C(=CC[C@@H]4[C@@]5(C)CC[C@H](O)C(C)(C)[C@@H]5CC[C@]43C)[C@@H]2C1	7	linolenic acid	-5.65135	-5.82612	18.6489
MOL000362	CC(=O)O[C@H]1CC[C@]2(C)[C@H]3CC=C4[C@@H]5CC(C)(C)CC[C@]5(C)CC[C@@]4(C)[C@]3(C)CC[C@H]2C1(C)C	7	linolenic acid	-9.64892	-8.72684	11.9705
MOL000432	CC/C=C\C/C=C\C/C=C\CCCCCCCC(=O)O	7	linolenic acid	-3.55244	-11.1074	14.5849
MOL000449	CC[C@H](/C=C/[C@@H](C)[C@H]1CC[C@H]2[C@@H]3CC=C4C[C@@H](O)CC[C@]4(C)[C@H]3CC[C@]12C)C(C)C	7	linolenic acid	-5.98349	-4.60257	18.0949
MOL000511	C[C@H]1[C@H](C)CC[C@]2(C(=O)O)CC[C@]3(C)C(=CC[C@@H]4[C@@]5(C)CC[C@H](O)C(C)(C)[C@@H]5CC[C@]43C)[C@H]12	7	linolenic acid	-6.30418	-8.59358	20.3604
MOL000530	C=C(C)[C@@H]1CC[C@]2(C)CC[C@]3(C)[C@H](CC[C@@H]4[C@@]5(C)CC[C@H](OC(C)=O)C(C)(C)[C@@H]5CC[C@]43C)[C@@H]12	7	linolenic acid	-9.79074	-8.64442	11.4975
MOL000551	CC1(C)CC[C@]2(C(=O)O)CC[C@]3(C)C(=CC[C@@H]4[C@@]5(C)CC[C@H](O)[C@@](C)(CO)[C@@H]5CC[C@]43C)[C@@H]2C1	7	linolenic acid	-6.34439	-9.43318	19.6061
MOL000675	CCCCCCCC/C=C\CCCCCCCC(=O)O	7	linolenic acid	-3.26626	-11.0134	16.2605
MOL000745	C[C@@H]1O[C@@H](O[C@H]2[C@H](O[C@H]3CC[C@@]4(C)[C@H](CC[C@@]5(C)[C@H]4CC=C4[C@@H]6CC(C)(C)CC[C@]6(C(=O)O[C@@H]6C[C@H](CO[C@@H]7O[C@H](CO)[C@@H](O)[C@H](O)[C@H]7O)[C@@H](O)[C@H](O)[C@H]6O)CC[C@]45C)[C@]3(C)CO)OC[C@H](O)[C@@H]2O)[C@H](O[C@@H]2O[C@H](CO)[C@@H](O)[C@H](O)[C@H]2O)[C@H](O)[C@H]1O	7	linolenic acid	-13.2761	-9.31083	13.9854
MOL000842	OC[C@H]1O[C@@](CO)(O[C@H]2O[C@H](CO)[C@@H](O)[C@H](O)[C@H]2O)[C@@H](O)[C@@H]1O	7	linolenic acid	-15.2225	-4.99597	11.395
MOL001337	OC[C@H]1O[C@@H](OCc2ccccc2)[C@H](O)[C@@H](O)[C@@H]1O	7	linolenic acid	-15.5567	-4.71856	11.1139
MOL001398	CC/C=C\C/C=C\C/C=C\CCCCCCCC(=O)OC	7	linolenic acid	-5.06886	-12.5714	14.0712
MOL001439	CCCCC/C=C\C/C=C\C/C=C\C/C=C\CCCC(=O)O	7	linolenic acid	-2.17971	-11.1763	14.7148
MOL001739	CCCCCC/C=C\CCCCCCCC(=O)O	7	linolenic acid	-4.13926	-10.91	15.9184
MOL001771	CC[C@@H](CC[C@@H](C)[C@H]1CC[C@H]2[C@@H]3CC=C4C[C@@H](O)CC[C@]4(C)[C@H]3CC[C@]12C)C(C)C	7	linolenic acid	-6.79093	-5.18985	17.9899
MOL002212	CC(C)(O)CC[C@@H](O)[C@](C)(O)[C@H]1CC[C@@]2(O)C3=CC(=O)[C@@H]4C[C@@H](O)[C@@H](O)C[C@]4(C)[C@H]3CC[C@]12C	7	linolenic acid	-10.6103	-7.47612	21.6769
MOL002731	CC1=CC(=O)CC(C)(C)[C@@]1(O)/C=C/[C@@H](C)O[C@@H]1O[C@H](CO)[C@@H](O)[C@H](O)[C@H]1O	7	linolenic acid	-14.4103	-8.46728	16.3248
MOL003595	C=C(C)[C@@H]1C=C[C@](C)(O)CC1	7	linolenic acid	-2.37047	-7.46925	14.9278
MOL003843	CC(C)(O)CC[C@@H](O)[C@H](O)[C@H]1CC[C@@]2(O)C3=CC(=O)[C@@H]4C[C@H](O[C@@H]5O[C@H](CO)[C@@H](O)[C@H](O)[C@H]5O)[C@@H](O)C[C@@]4(C)[C@H]3CC[C@@]12C	7	linolenic acid	-14.084	-8.46049	15.7608
MOL003844	CC(C)(O)CC[C@@H](O)[C@H](O)[C@H]1CC[C@@]2(O)C3=CC(=O)[C@@H]4C[C@H](O)[C@@H](O)C[C@@]4(C)[C@H]3CC[C@@]12C	7	linolenic acid	-10.7561	-7.06941	20.9309
MOL003850	C=C(CC/C=C(\C)CO)[C@H]1CC[C@]2(C)[C@@H]1CC[C@@H]1[C@@]3(C)CCC(=O)C(C)(C)[C@H]3CC[C@]12C	7	linolenic acid	-7.75176	-7.36845	21.6674
MOL003851	CC(=O)[C@H]1CC[C@]2(O)[C@@H]3CC=C4C[C@@H](O)CC[C@@]4(C)[C@H]3C[C@@H](O)[C@@]12C	7	linolenic acid	-7.5976	-7.44084	19.4594
MOL003852	CC(=O)O[C@H]1OC=C(COC(=O)[C@@H](OC(=O)CC(C)C)C(C)C)[C@@]2(O)C[C@H](OC(=O)CC(C)C)[C@]3(CO3)[C@H]12	7	linolenic acid	-12.9015	-10.5586	12.957
MOL003855	CC1(C)CC[C@]2(C(=O)O)CC[C@]3(C)C(=CC[C@H]4[C@@]5(C)CC[C@H](O)[C@@](C)(CO)[C@H]5CC[C@@]43C)[C@@H]2C1	7	linolenic acid	-7.38509	-9.2684	19.8787
MOL003868	CC[C@@H](CC[C@@H](C)[C@H]1CC[C@H]2[C@@H]3CC=C4C[C@@H](O[C@@H]5OC[C@@H](O)[C@H](O)[C@H]5O)CC[C@]4(C)[C@H]3CC[C@]12C)C(C)C	7	linolenic acid	-13.758	-7.31935	13.3244
MOL003882	CC(=O)O[C@H]1CC[C@]2(C)C3=CC[C@@H]4[C@@H]([C@H]5C[C@H](CC(C)(C)O)O[C@@H]5O)CC[C@@]4(C)[C@]3(C)[C@H](O)C[C@@H]2C1(C)C	7	linolenic acid	-11.5847	-8.41394	12.9215
MOL003975	CC/C=C/C/C=C/C/C=C/CCCCCCCCCC(=O)OC	7	linolenic acid	-4.29181	-13.5163	14.0761
MOL004741	CC1(C)CCC[C@@]2(C)OC(=O)C=C12	7	linolenic acid	-8.0823	-8.82497	10.3919
MOL005538	CC/C=C\C/C=C\C/C=C\CCCCCCCCO	7	linolenic acid	-2.29028	-8.60735	14.3236
MOL007179	CC/C=C\C/C=C\C/C=C\CCCCCCCC(=O)OCC	7	linolenic acid	-5.29286	-13.2549	12.9253
MOL011081	CC/C=C/C/C=C/C/C=C/CCCCCCCC(=O)OC	7	linolenic acid	-4.07198	-12.6612	13.2247
MOL012456	C[C@@H](CO)CC[C@@H](O)[C@](C)(O)[C@H]1CC[C@@]2(O)C3=CC(=O)[C@@H]4C[C@@H](O)[C@@H](O)C[C@]4(C)[C@H]3CC[C@]12C	7	linolenic acid	-10.4475	-6.62711	21.6076
MOL000198	C=C[C@](C)(O)CCC=C(C)C	8	pent-1-en-3-ol	-1.50631	-5.28558	11.5624
MOL000252	CC(C)=CCC/C(C)=C/CC/C(C)=C/CO	8	pent-1-en-3-ol	0.239723	-4.61977	9.46106
MOL000674	CC(=O)OC/C=C(\C)CC/C=C(\C)CCC=C(C)C	8	pent-1-en-3-ol	-0.70374	-6.05531	8.53231
MOL000920	C=C[C@@](C)(O)CCC=C(C)C	8	pent-1-en-3-ol	-0.934015	-5.47081	11.7041
MOL001442	C/C(=C\CO)CCC[C@H](C)CCC[C@H](C)CCCC(C)C	8	pent-1-en-3-ol	-0.585522	-3.50552	10.2223
MOL001584	C=C[C@](C)(CCC=C(C)C)OC(=O)CC	8	pent-1-en-3-ol	-4.67477	-7.88096	8.5191
MOL001691	O=C1O[C@H]([C@@H](O)CO)C(O)=C1O	8	pent-1-en-3-ol	-5.72018	-8.25996	7.03792
MOL002522	CC(C)=CCC[C@H](C)CCO	8	pent-1-en-3-ol	-1.7563	-6.66558	13.0292
MOL003081	CC/C=C\CO	8	pent-1-en-3-ol	-0.908839	-2.27785	6.99551
MOL009490	CC/C=C/CCOC(C)=O	8	pent-1-en-3-ol	-4.56153	-6.56231	2.71545
MOL010610	CCC/C=C/CO	8	pent-1-en-3-ol	-0.648484	-2.86224	8.10487
MOL010720	CC/C=C\CCOC(C)=O	8	pent-1-en-3-ol	-4.56153	-6.56231	2.71545
MOL011563	CC/C=C/CCO	8	pent-1-en-3-ol	-1.33431	-2.18969	4.99157
MOL013036	C=C[C@@H](O)CC	8	pent-1-en-3-ol	-2.23681	-1.41226	6.32951
MOL000514	CCCCCCCCCCCCCCCCCCCCCCCCCCCCC	9	Henicosane	-2.36957	8.58517	5.78127
MOL000610	CCCCCCCCCCCCC	9	Henicosane	-4.89507	10.4613	6.88133
MOL000863	CCCCCCCCCC	9	Henicosane	-2.41393	11.7605	8.50061
MOL000864	CCCCCCCCCCCCCCC	9	Henicosane	-3.96964	9.0988	8.39807
MOL000865	CCCCCCCCCCCCCCCC	9	Henicosane	-3.95582	10.8739	8.73016
MOL000867	CCCCCCCCCCCCCCCCC	9	Henicosane	-2.38426	8.22292	7.57866
MOL000868	CCCCCCCCCCCCCCCCCCCC	9	Henicosane	-3.97322	8.66752	6.6505
MOL000869	CCCCCCCCCCCCCCCCCCCCC	9	Henicosane	-0.0745796	10.6537	6.69692
MOL000885	CCCCCCCCCCCC	9	Henicosane	-2.2494	10.3037	4.75648
MOL000886	CCCCCCCCCCCCCC	9	Henicosane	-0.823925	9.38764	5.55001
MOL001394	CCCCCCCCCCCCCCCCCC	9	Henicosane	-3.16035	10.3974	7.09879
MOL001399	CCCCCCCCCCCCCCCCCCCCCC	9	Henicosane	-2.45435	12.5245	6.63288
MOL001401	CCCCCCCCCCCCCCCCCCCCCCCCCC	9	Henicosane	-1.84129	10.3668	6.77017
MOL001402	CCCCCCCCCCCCCCCCCCCCCCCCCCCC	9	Henicosane	-0.839929	10.5348	8.53876
MOL001619	CCCCCCCCCCCCCCCCCCC	9	Henicosane	-1.33054	11.6494	5.46155
MOL001747	CCCCCCCCCCCCCCCCCCCCCCCC	9	Henicosane	-3.49358	11.6293	5.47148
MOL002137	CCCCCCCC	9	Henicosane	-3.85833	9.87437	5.32881
MOL002229	CCCCCCCCCCCCCCCCCCCCCCCCCCC	9	Henicosane	-4.01921	12.1105	7.31531
MOL002376	CCCCCCCCCCCCCCCCCCCCCCCCC	9	Henicosane	-2.27232	9.62637	8.70046
MOL002378	CCCCCCCCCCC	9	Henicosane	-0.99204	12.0831	7.48237
MOL005819	CC(C)CCCC[C@@H](C)CCCC(C)C	9	Henicosane	-0.791243	8.92234	7.46442
MOL013009	C[C@H]1C[C@H]2CCCC[C@H]2C[C@@H]1C	9	Henicosane	-2.34376	10.6434	10.8573
MOL003841	CC(C)=CCC/C(C)=C/Cc1c(O)cc(O)cc1-c1cc2ccc(O)cc2o1	10	Moracin E	21.1275	4.26201	-4.20993
MOL003842	CC1=C[C@@H]2c3c(O)cc(-c4cc5ccc(O)cc5o4)cc3O[C@]3(c4ccc(O)cc4O)Oc4cc(O)ccc4[C@@H](C1)[C@H]23	10	Moracin E	22.6134	2.8795	-5.78
MOL003856	COc1cc(O)cc(-c2cc3cc(O)c(OC)cc3o2)c1	10	Moracin E	19.106	2.8183	-4.47524
MOL003857	CC(C)=CCc1c(O)cc(-c2cc3ccc(O)cc3o2)cc1O	10	Moracin E	20.8674	3.78798	-4.64037
MOL003858	CC1(C)C=Cc2c(O)cc(-c3cc4ccc(O)cc4o3)cc2O1	10	Moracin E	19.8626	0.775555	-6.75531
MOL003859	CC1(C)C=Cc2c(cc(O)cc2-c2cc3ccc(O)cc3o2)O1	10	Moracin E	19.7789	0.587286	-6.93925
MOL003860	COc1cc2cc(-c3cc(O)cc(O)c3)oc2cc1OC	10	Moracin E	19.1772	2.88488	-4.34092
MOL003861	CC1=CCc2c(ccc3cc(-c4cc(O)cc(O)c4)oc23)OC1	10	Moracin E	22.4336	1.7871	-3.71953
MOL003862	COc1cc2c(c3oc(-c4cc(O)cc(O)c4)cc13)CC=C(C)CO2	10	Moracin E	22.3955	1.69895	-3.47351
MOL003866	COc1ccc(C/C=C(\C)CCC=C(C)C)c2oc(-c3cc(O)cc(O)c3)cc12	10	Moracin E	21.2734	2.91537	-3.49694
