# Supplementary material for: Mulberry Leaf Compounds and Gut Microbiota in Alzheimer’s Disease and Diabetes: A Study Using Network Pharmacology, Molecular Dynamics Simulation, and Cellular Assays
Source: Int J Mol Sci. 2024 Apr 5;25(7):4062. doi: 10.3390/ijms25074062 (PMC11012793; doi:10.3390/ijms25074062)
Supplement: Supplementary file 1 [file ijms-25-04062-s001.zip › Table S2.xls]

## Sheet: Sheet1
quercetin	kaempferol	rhamnocitrin	tetramethoxyluteolin	norartocarpetin
NOS2	NOS2	NOS2	SLC2A1	PTPN1
SLC2A1	PTPN1	SLC2A1	AR	SLC2A1
EGFR	SLC1A2	HIF1A	HIF1A	AR
MMP9	SLC2A1	NFE2L2	NFE2L2	MMP9
NFE2L2	EGFR	PIK3R1	SERPINE1	SERPINE1
SERPINE1	MMP9	ABCG2	PTGS2	GSK3B
GSK3B	SERPINE1	MIF	ABCG2	ABCG2
IGF1R	GSK3B	PLAT	MIF	CD38
PIK3R1	IGF1R	CYP19A1	PLAT	HTR2C
MMP3	PIK3R1	CAMKK2	CYP19A1	MIF
ABCG2	MMP3	CDK5	KIF11	PLAT
MIF	ABCG2	GPBAR1	AHR	CYP19A1
PLAT	MIF	ACE	CAMKK2	KIF11
CYP19A1	PLAT	DPP4	NAMPT	AHR
CAMKK2	CYP19A1	ESR1	GPBAR1	CAMKK2
CDK5	AHR	ANPEP	DPP4	CDK5
GPBAR1	CAMKK2	APP	ANPEP	GPBAR1
DPP4	CDK5	TLR4	APP	DPP4
ESR1	GPBAR1	CYP3A4	TLR4	ANPEP
ANPEP	DPP4	LGALS3	BCHE	APP
APP	MMP2	GLO1	CYP3A4	MMP2
MMP2	LGALS3	ALOX12	LGALS3	CYP3A4
PIK3CG	MET	ESR2	MME	LGALS3
CYP3A4	MME	ALOX5	GLO1	GLO1
LGALS3	GLO1	ABCB1	ALOX12	NR3C2
MET	NR3C2	TTR	FAAH	PARP1
MME	ALOX12	CAPN1	ABCB1	ALOX12
GLO1	KDR	CTSD	TTR	DRD2
NR3C2	DRD2	ALOX15	CAPN1	ESR2
ALOX12	F2	TERT	CTSD	ACHE
KDR	ALOX5	CFTR	TERT	ABCB1
ESR2	ACHE	CLK2	CFTR	TTR
F2	ABCB1	FASN	CLK2	CAPN1
ALOX5	TTR	KDM1A	CREBBP	ADORA1
ACHE	CAPN1	HSP90AA1	KDM1A	CTSD
ABCB1	ADORA1	MAOA	HSP90AA1	ESRRA
TTR	CTSD	PDGFRB	MAOA	ALOX15
CAPN1	ESRRA	PIN1	PDE4D	CFTR
CTSD	ALOX15	PTPN11	PTPN11	FASN
ALOX15	MAPT	ACVRL1	ACVRL1	HSP90AA1
MAPT	TERT	STAT1	STAT1	MAOA
TERT	CFTR	GUSB	PLAU	PDE4D
CFTR	AKR1C2	GRIA2	PTGS1	PIN1
CLK2	FASN	ABCC1	ITGB1	PTPN11
AKR1C2	MAOA	CDK1	GRIA2	CA2
FASN	PIN1	ERN1	ABCC1	ACVRL1
KDM1A	PTPN11	MAOB	CDK1	STAT1
MAOA	CA2	F13A1	MAOB	GUSB
PIN1	STAT1	CHRM2	F13A1	HDAC2
PTPN11	CSNK2A1	APEX1	APEX1	GRIA2
CA2	ADRB1			ABCC1
STAT1	HDAC2			CDK1
CSNK2A1	GRIA2			ERN1
ADRB1	ABCC1			MAOB
HDAC2	CDK1			F13A1
GRIA2	ERN1			CHEK1
ABCC1	DRD4			APEX1
CDK1	F13A1			PSMB2
ERN1	APEX1
DRD4
F13A1
APEX1
