# Supplementary material for: Mulberry Leaf Compounds and Gut Microbiota in Alzheimer’s Disease and Diabetes: A Study Using Network Pharmacology, Molecular Dynamics Simulation, and Cellular Assays
Source: Int J Mol Sci. 2024 Apr 5;25(7):4062. doi: 10.3390/ijms25074062 (PMC11012793; doi:10.3390/ijms25074062)
Supplement: Supplementary file 1 [file ijms-25-04062-s001.zip › Table S3.xls]

## Sheet: Sheet1
Concentration(μM)	Inhibition rate(%)
0	0
1.654	0.2
3.308	5.9
16.543	7.7
33.086	19.2
82.715	32.2
165.43	42.1
330.862	52.2
661.725	67.9
1323.45	90.2
1654.31	97.9
3308.6	98
